# Supplementary material for: Three-year monitoring of stable isotopes of precipitation at ConcordiaStation, East Antarctica
Source: Copernicus journal article supplement (doi:10.5194/tc-10-2415-2016), 2016-10-17
Supplement: Supplementary file 1 [file tc-10-2415-2016-supplement.zip]

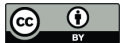

*Supplement of*

## **Three-year monitoring of stable isotopes of precipitation at Concordia Station, East Antarctica**

**Barbara Stenni et al.**

*Correspondence to:* Barbara Stenni (barbara.stenni@unive.it)

- tc-10-2415-2016-supplement-title-page.pdf
- tc-10-2415-2016-supplement.xlsx

The copyright of individual parts of the supplement might differ from the CC-BY 3.0 licence.
